# Supplementary material for: Multivariate Cluster-Based Multifactor Dimensionality Reduction to Identify Genetic Interactions for Multiple Quantitative Phenotypes
Source: Hindawi journal article supplement (doi:10.1155/2019/4578983), 2019-07-11
Supplement: f1 [file 4578983.f1.zip]

# Supplemental materials

There were 10 combinations of minor allele frequencies (MAFs), and 5 models for each simulation setup. The MAF was 0.2, up to model 5. From models 6 to 10, the MAF was 0.4. We also considered correlation values of 0, 0.25, and 0.5. CMDR (multi-CMDR), MCMDR2 (multi-CMDR without trimming), MCMDR3 (multi-CMDR without membership score), MQMDR (multi-QMDR), QMDR. Y1 (QMDR with  $Y_1$ ), and QMDR Y2 (QMDR with  $Y_2$ )

## Multivariate Normal Distributions

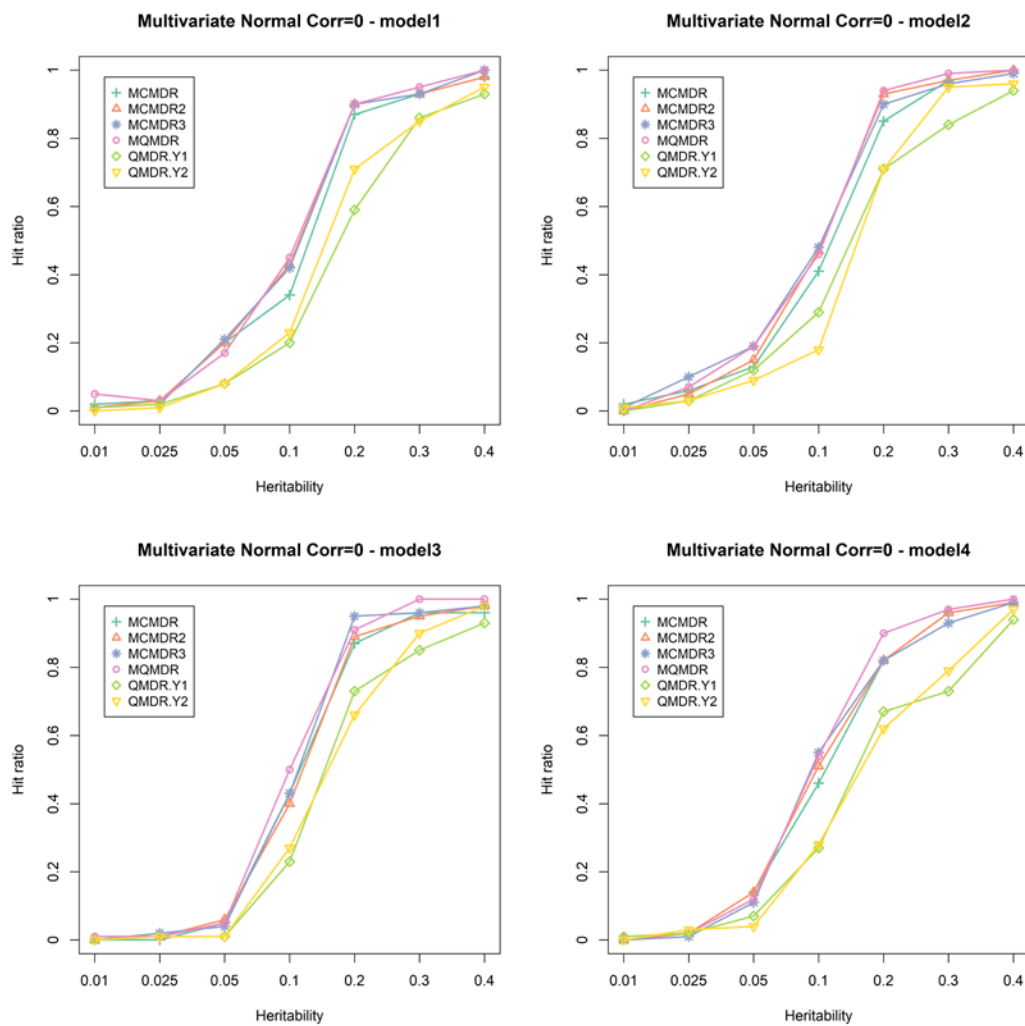

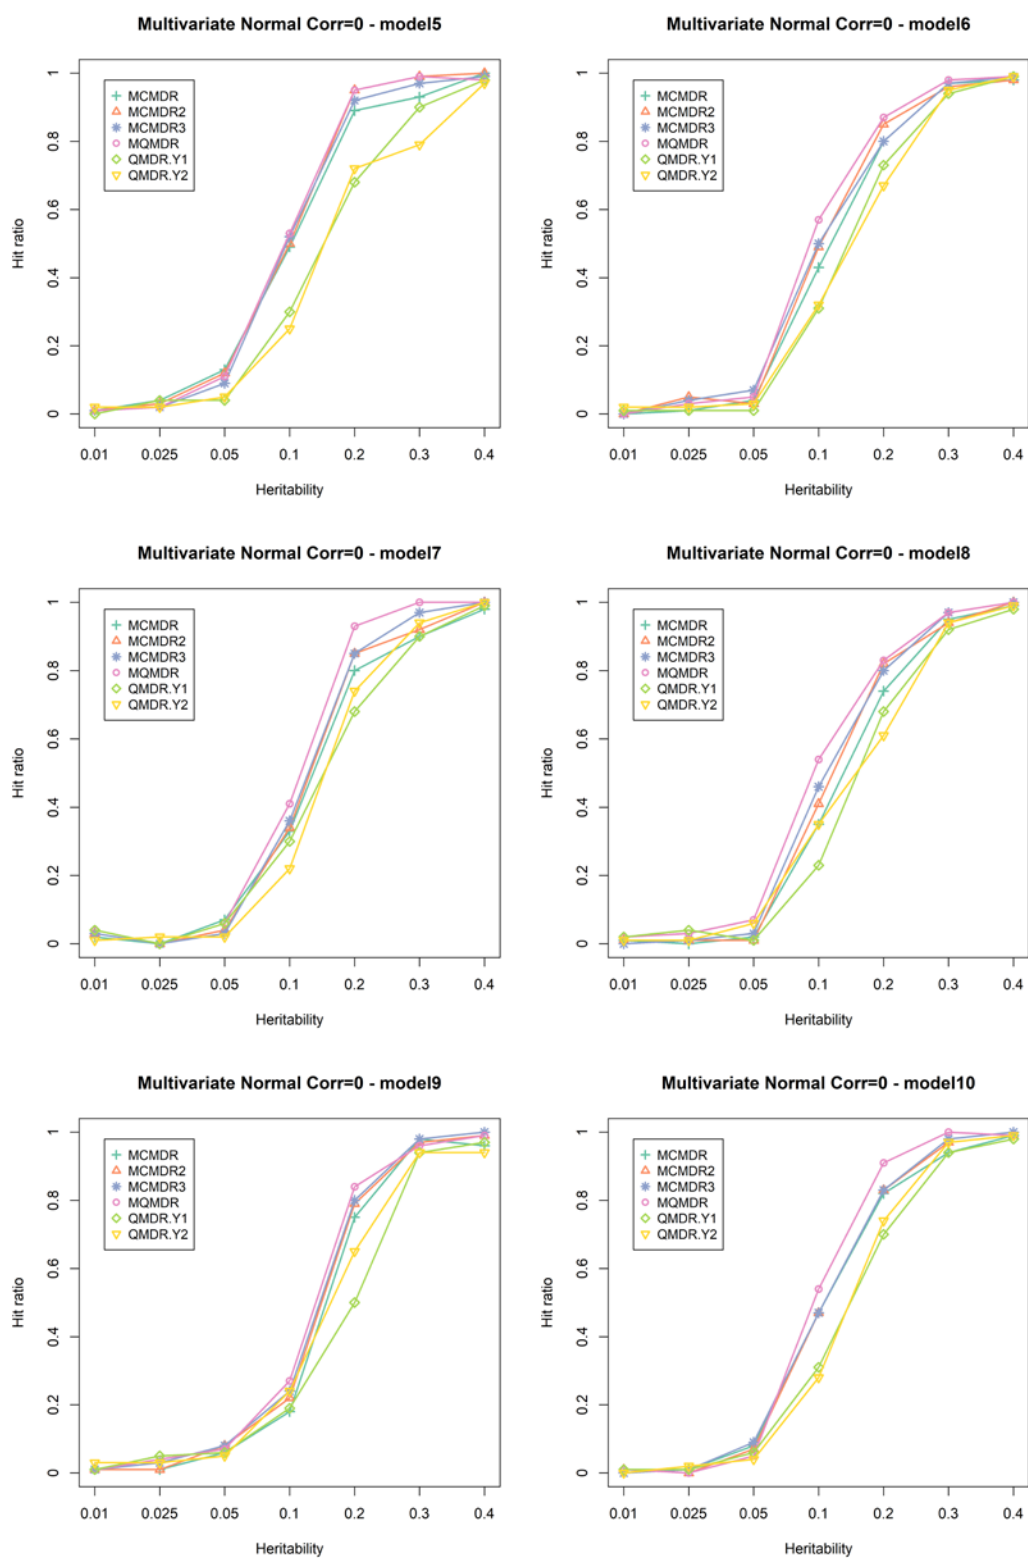

**Supplemental Figure 1.** Hit-ratios for multivariate normal distributions with zero correlation, for 10 models.

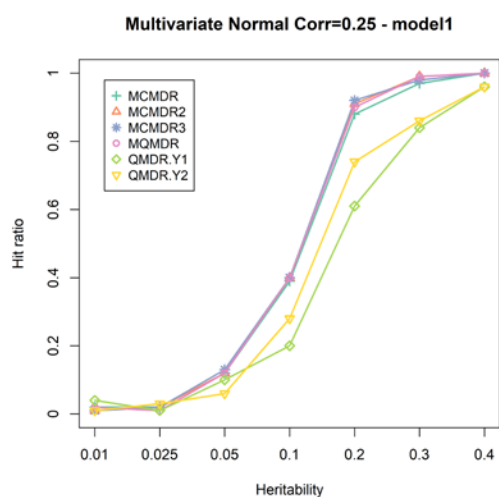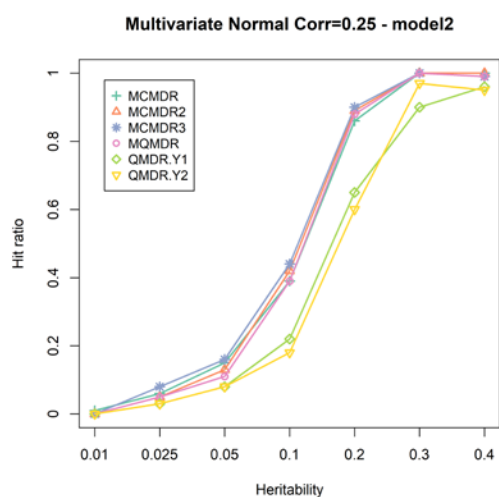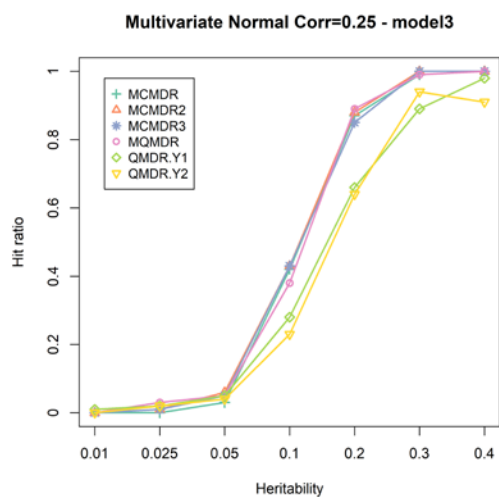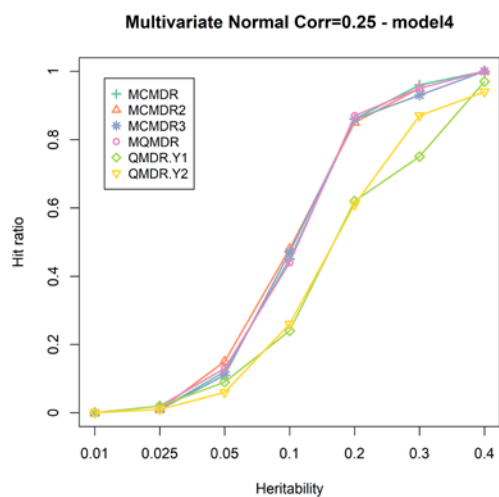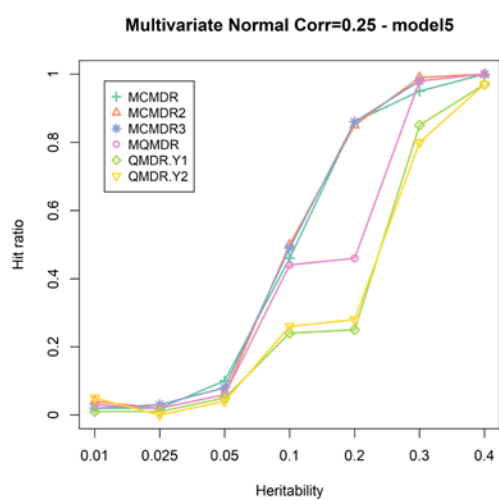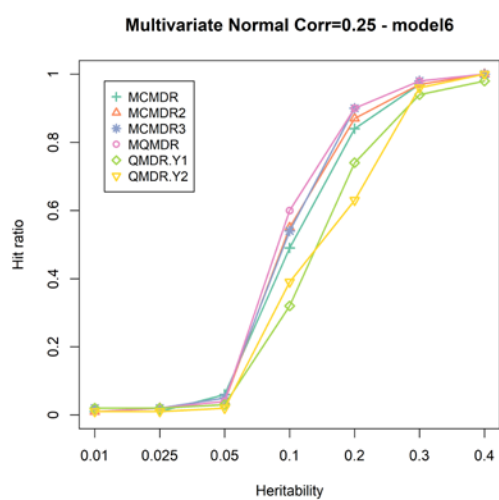

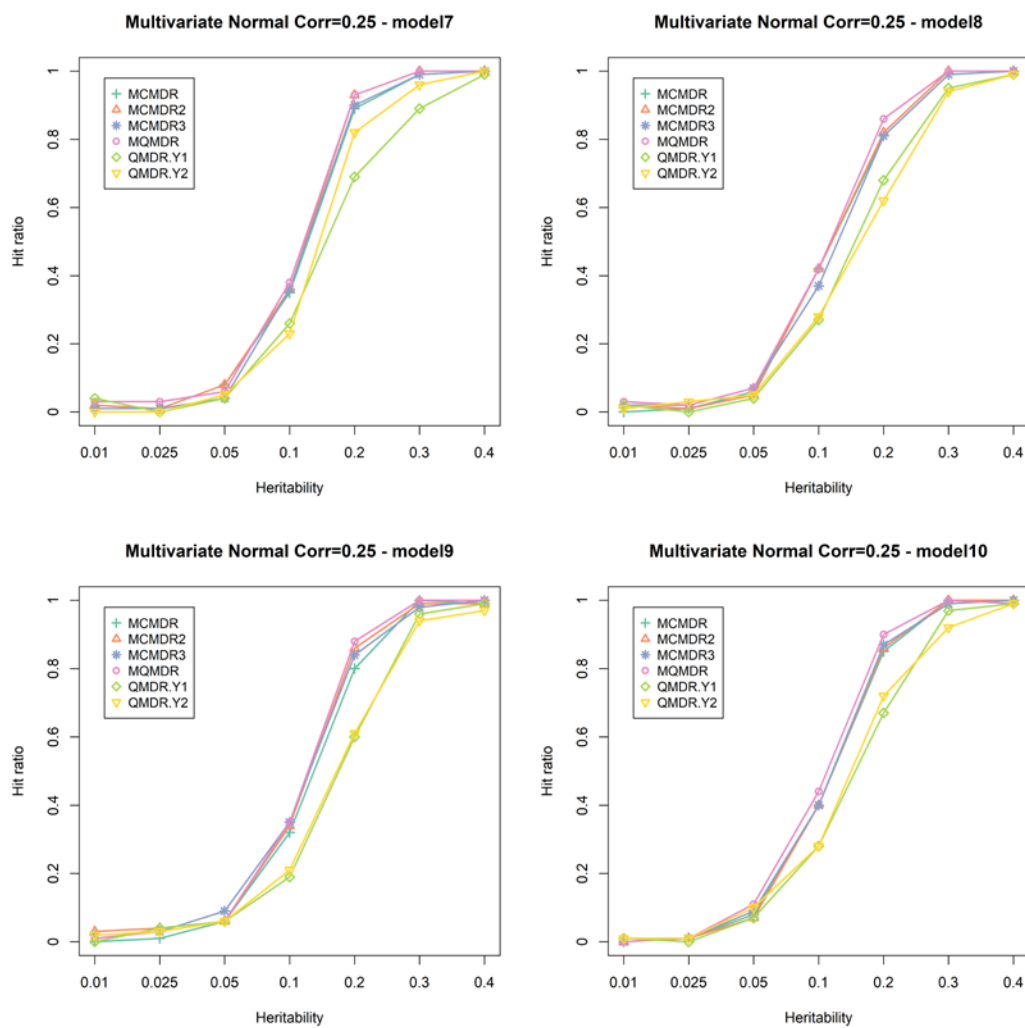

**Supplemental Figure 2.** Hit-ratios for multivariate normal distributions with correlation 0.25, for 10 models.

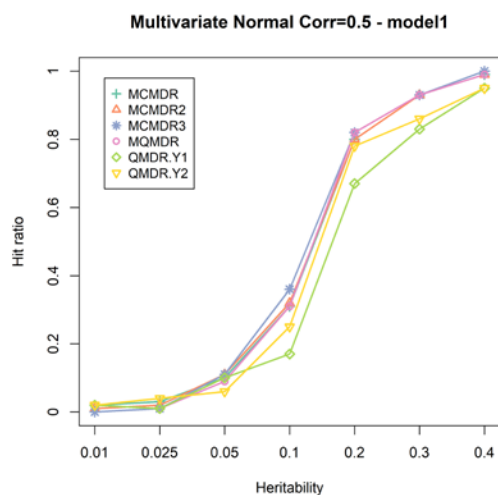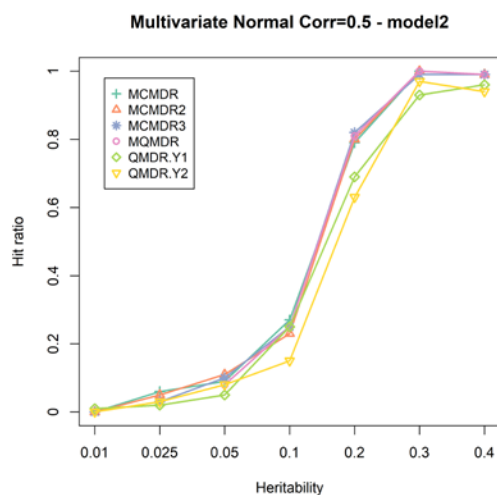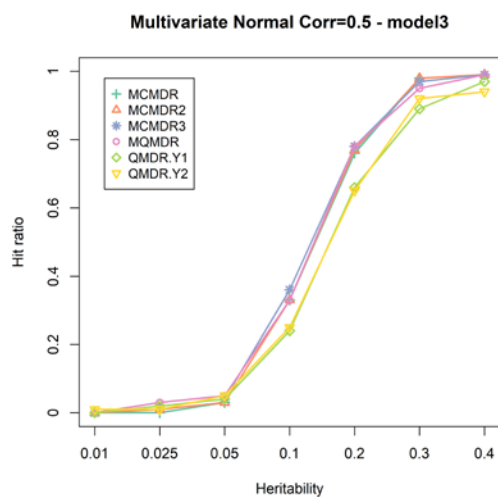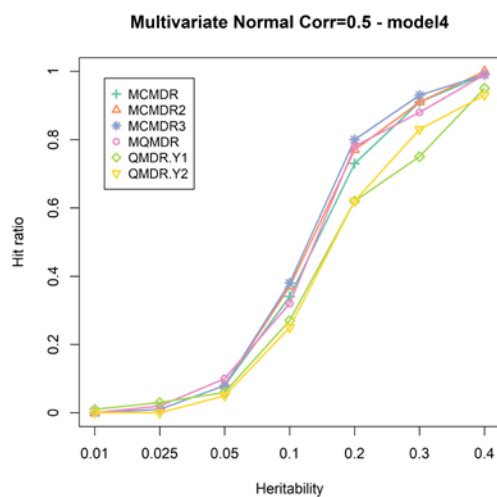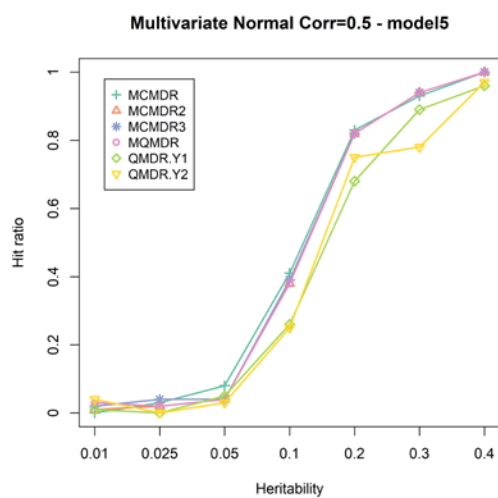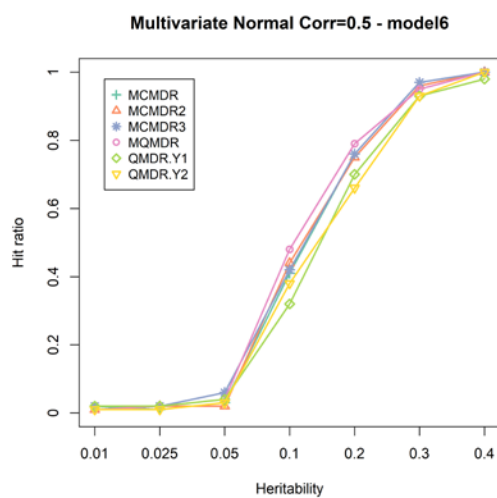

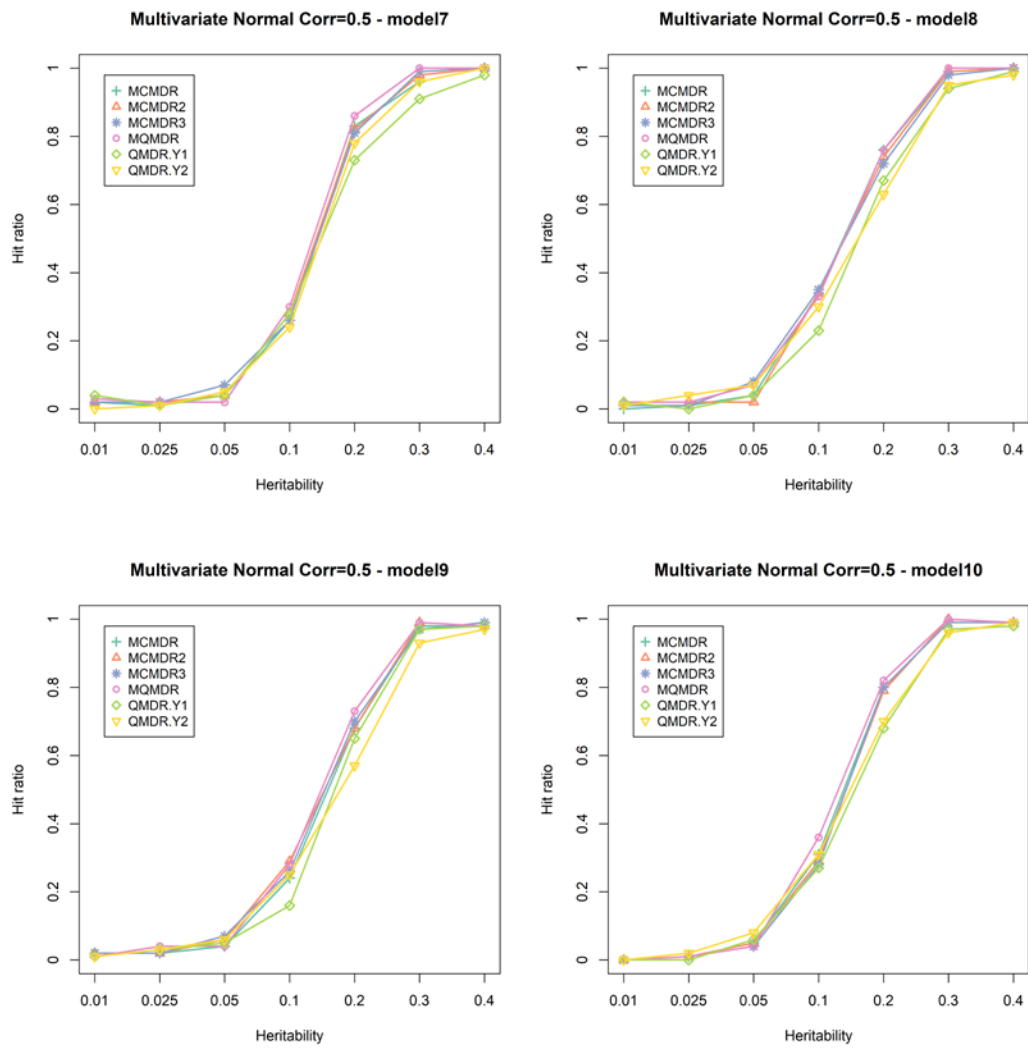

**Supplemental Figure 3.** Hit-ratios for multivariate normal distribution with correlation 0.5 for 10 models

# Multivariate Gamma Distribution

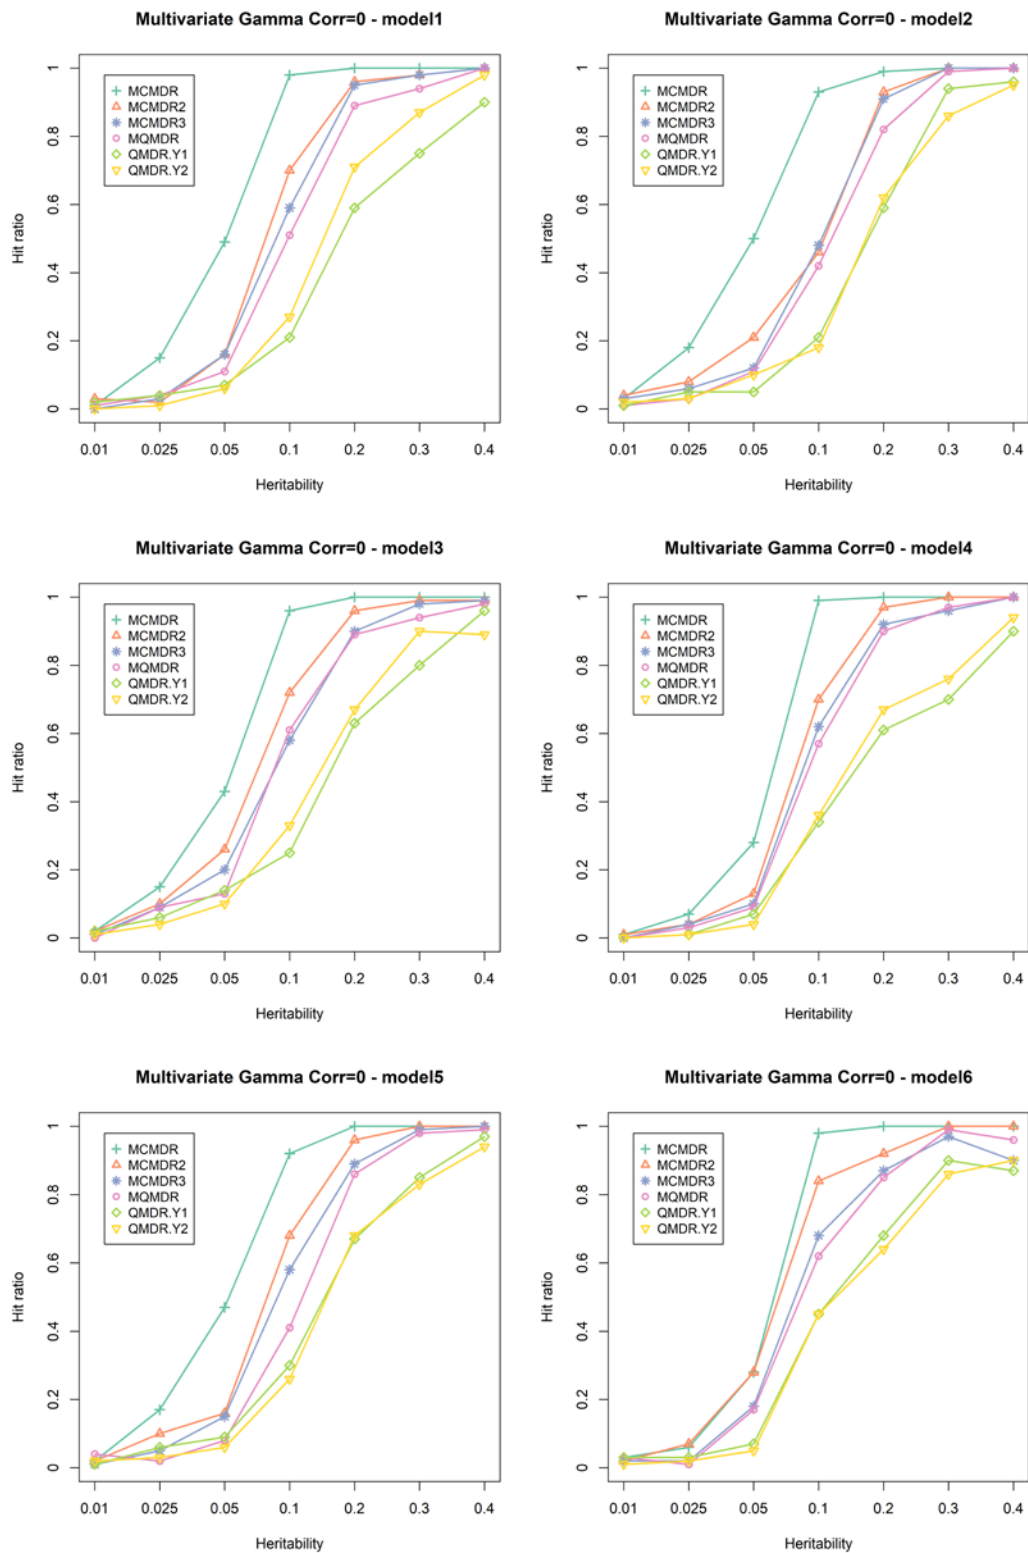

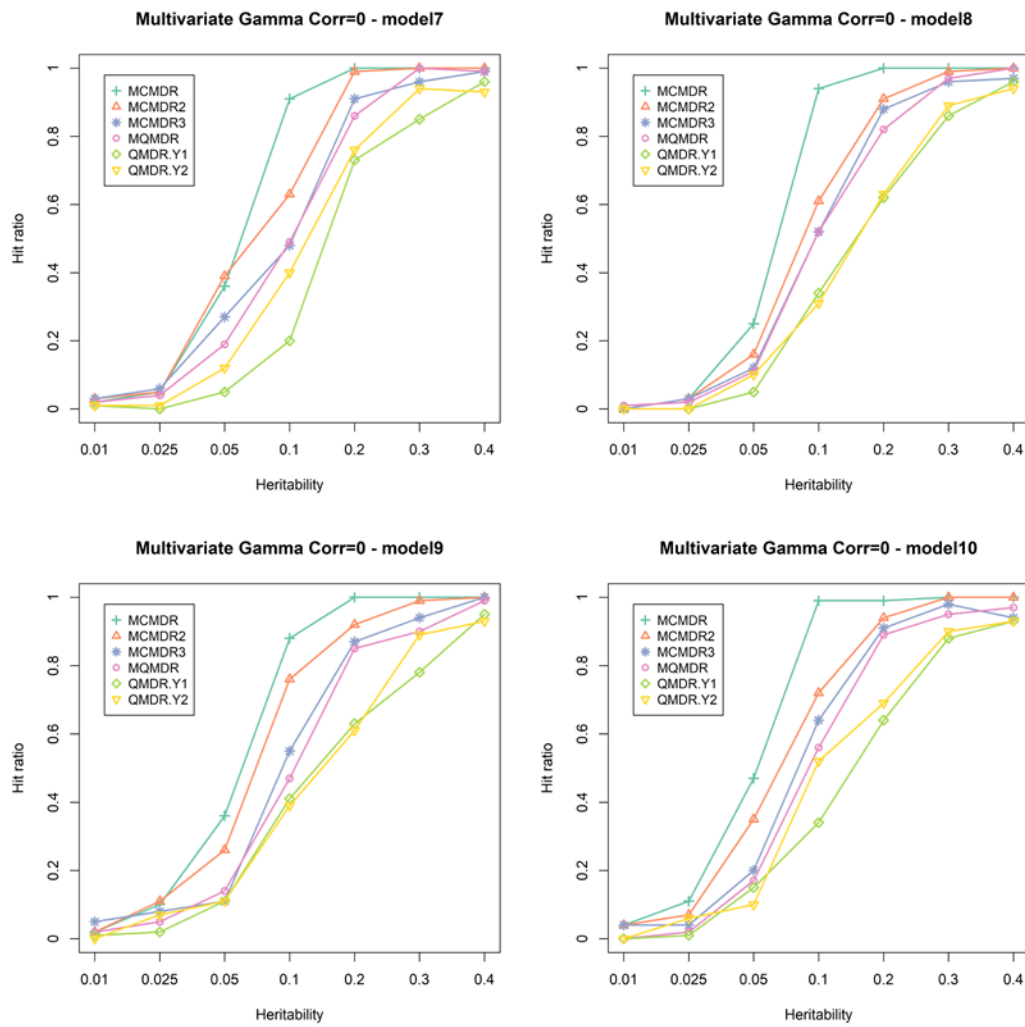

**Supplemental Figure 4.** Hit-ratios for multivariate gamma distributions, with zero correlation, for 10 models.



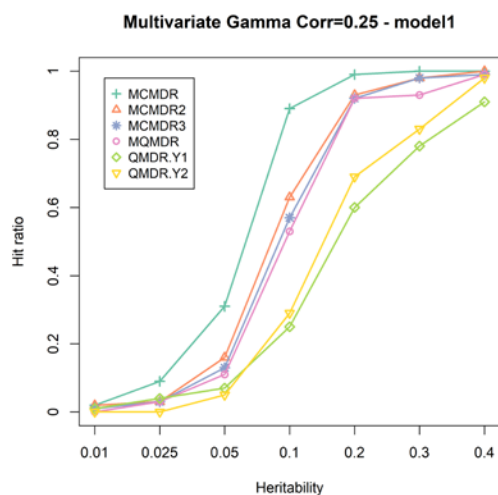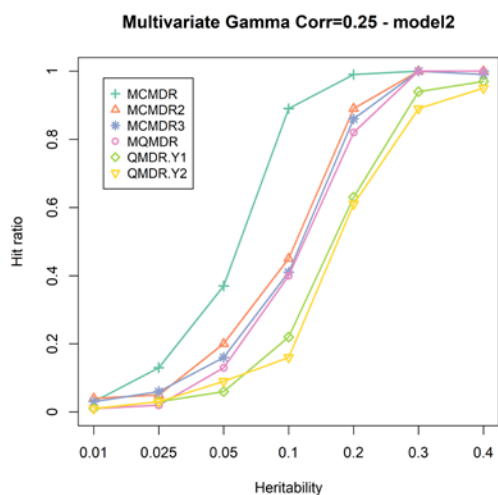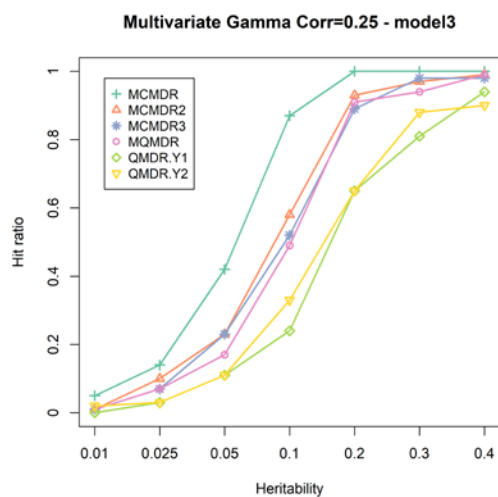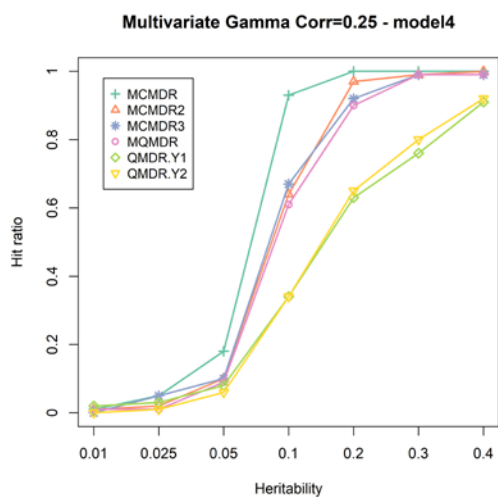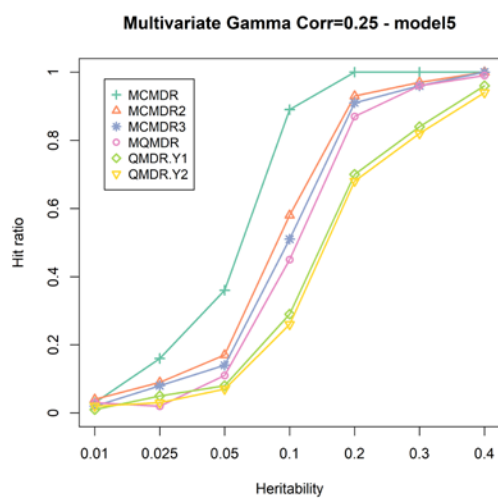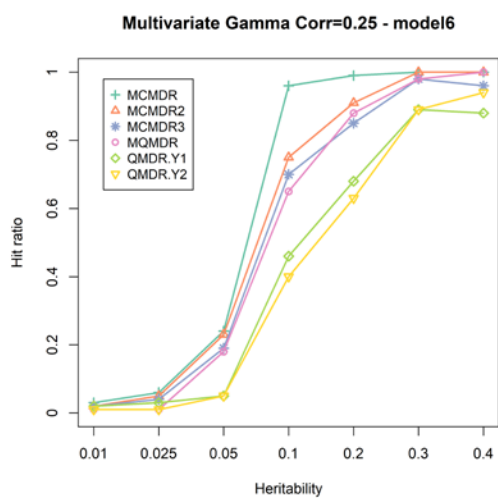

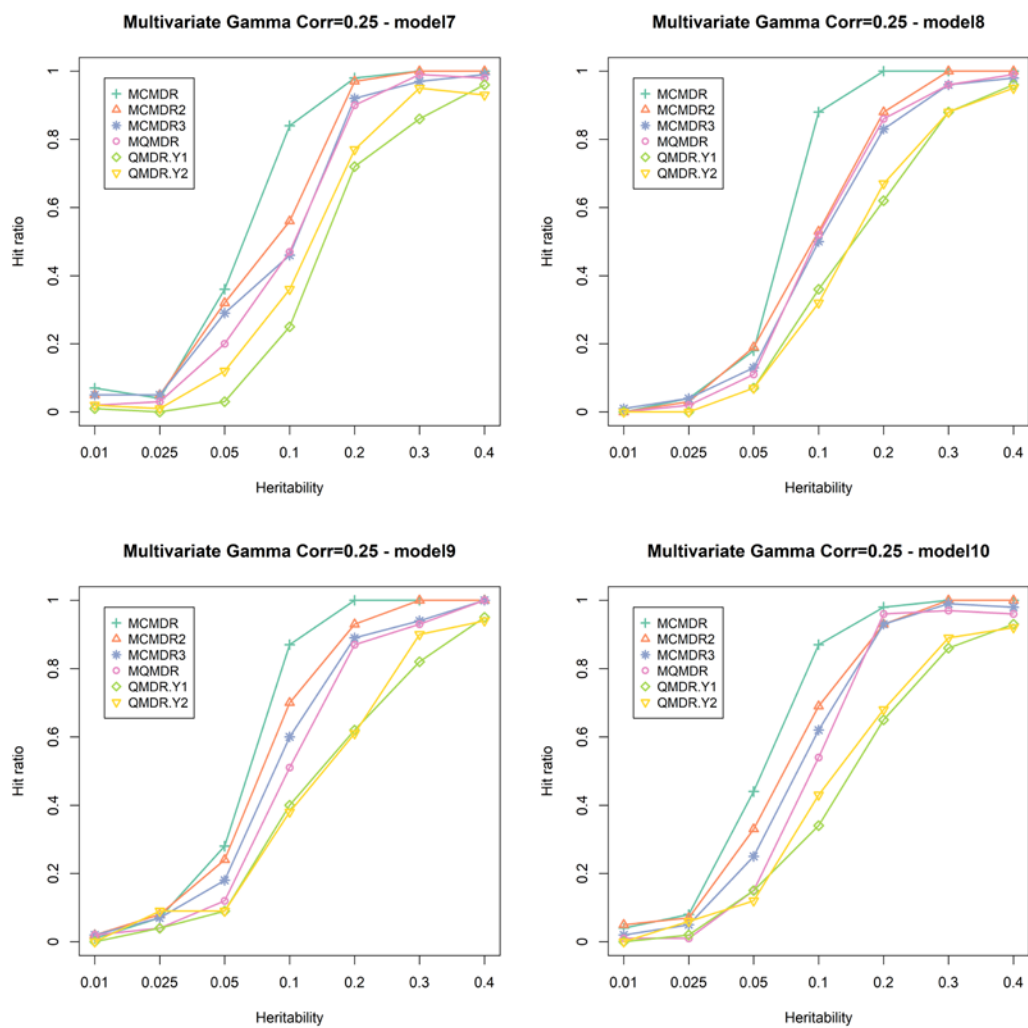

**Supplemental Figure 5.** Hit-ratios for multivariate gamma distributions, with correlation 0.25, for 10 models.

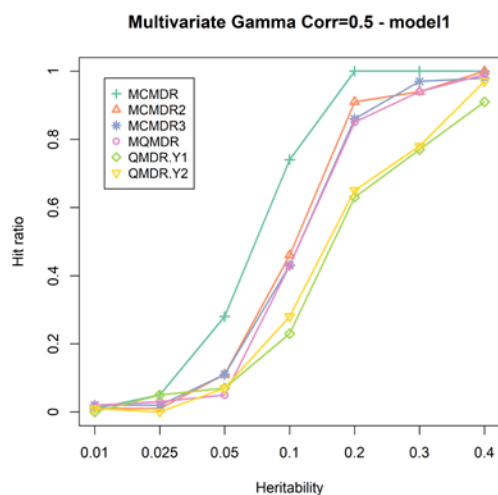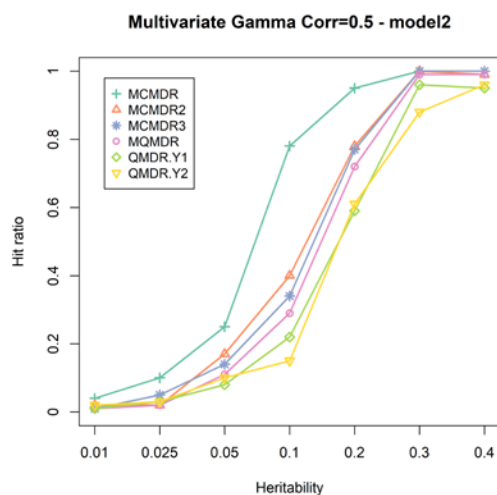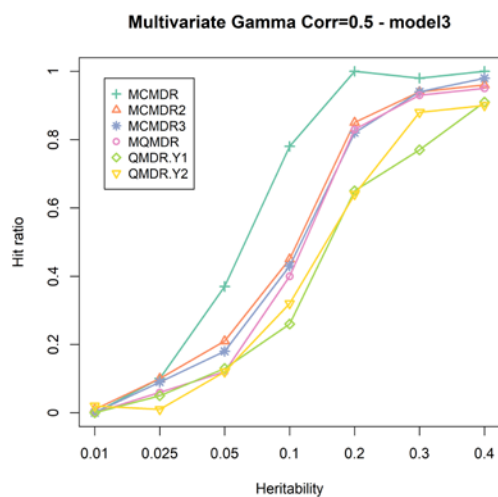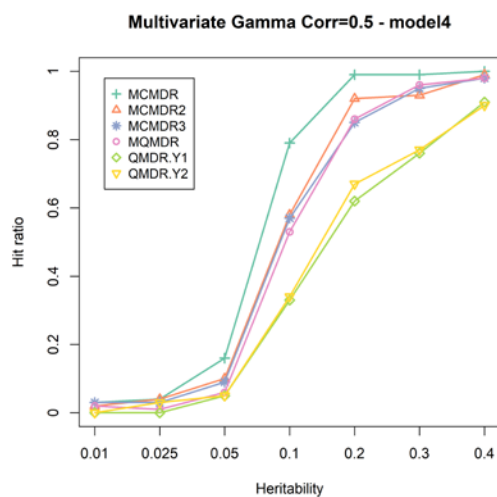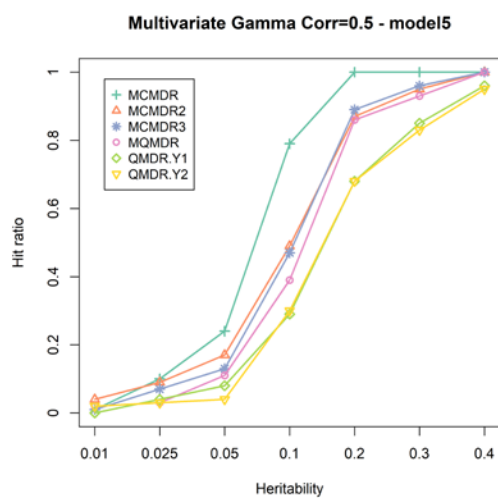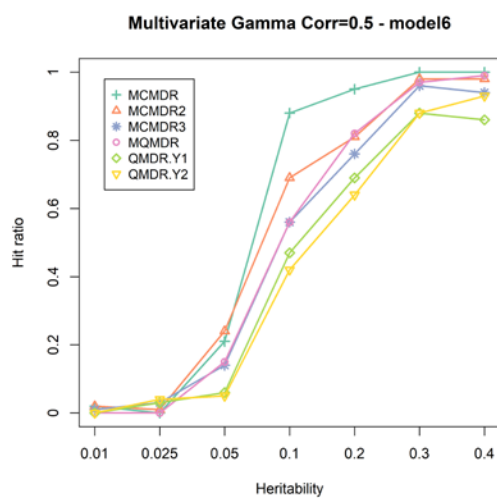

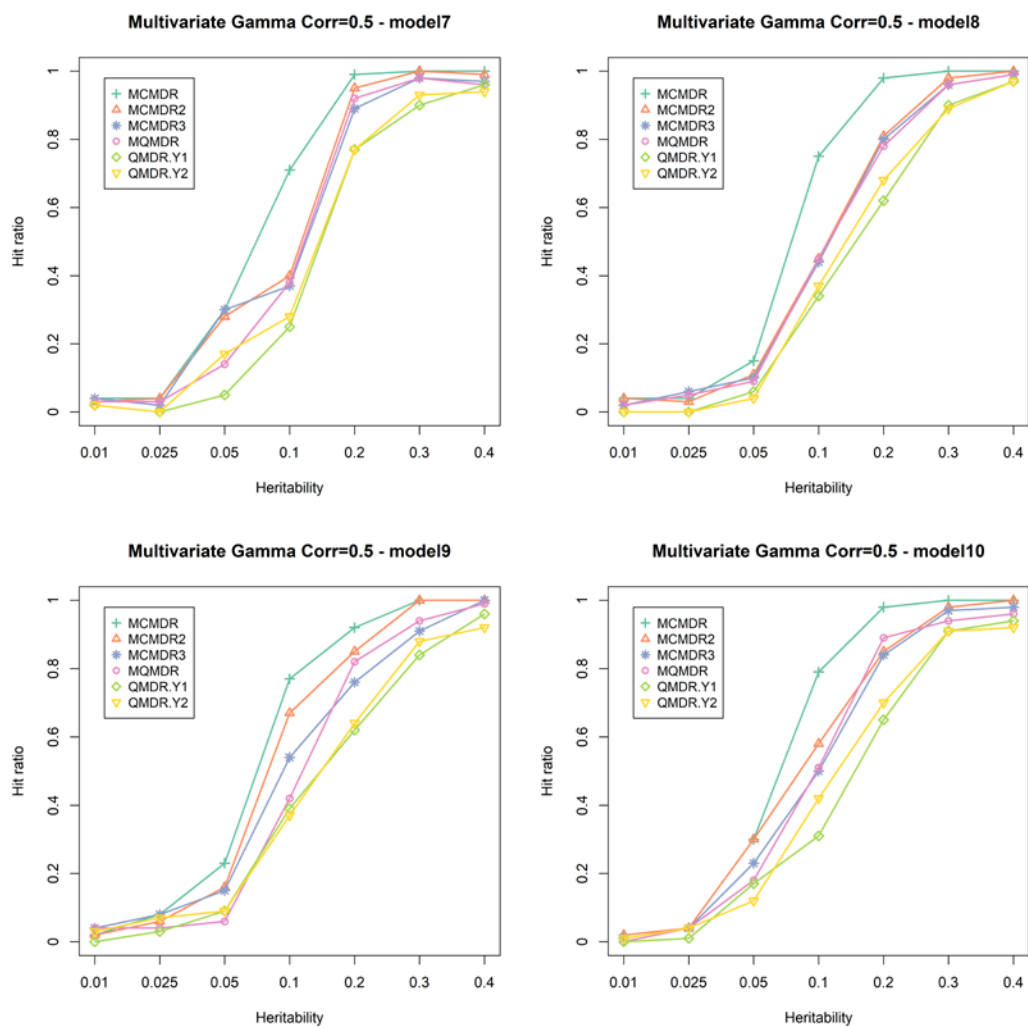

**Supplemental Figure 6.** Hit-ratios for multivariate gamma distributions, with correlation 0.5, for 10 models.

## Multivariate normal distribution

|                  | MCMDR1 | MCMDR2 | MCMDR3 | MQMDR | QMDR.Y1 | QMDR.Y2 |
|------------------|--------|--------|--------|-------|---------|---------|
| <b>HET:0.01</b>  | 0.005  | 0.003  | 0.007  | 0.004 | 0.005   | 0.005   |
| <b>HET:0.025</b> | 0.005  | 0.007  | 0.006  | 0.005 | 0.007   | 0.004   |
| <b>HET:0.05</b>  | 0.005  | 0.007  | 0.006  | 0.008 | 0.01    | 0.012   |
| <b>HET:0.1</b>   | 0.004  | 0.002  | 0.002  | 0.004 | 0.005   | 0.005   |
| <b>HET:0.2</b>   | 0.005  | 0.004  | 0.005  | 0.006 | 0.004   | 0.011   |
| <b>HET:0.3</b>   | 0.009  | 0.005  | 0.005  | 0.007 | 0.003   | 0.007   |
| <b>HET:0.4</b>   | 0.005  | 0.008  | 0.003  | 0.005 | 0.008   | 0.006   |

**Supplemental Table 1.** Empirical false positive rate for multivariate normal distributions with zero correlation

|                  | MCMDR1 | MCMDR2 | MCMDR3 | MQMDR | QMDR.Y1 | QMDR.Y2 |
|------------------|--------|--------|--------|-------|---------|---------|
| <b>HET:0.01</b>  | 0.006  | 0.001  | 0.004  | 0.006 | 0.003   | 0.006   |
| <b>HET:0.025</b> | 0.003  | 0.002  | 0.008  | 0.004 | 0.007   | 0.006   |
| <b>HET:0.05</b>  | 0.008  | 0.011  | 0.012  | 0.006 | 0.008   | 0.009   |
| <b>HET:0.1</b>   | 0.005  | 0.007  | 0.007  | 0.003 | 0.003   | 0.008   |
| <b>HET:0.2</b>   | 0.005  | 0.004  | 0.004  | 0.008 | 0.005   | 0.005   |
| <b>HET:0.3</b>   | 0.006  | 0.008  | 0.006  | 0.006 | 0.003   | 0.005   |
| <b>HET:0.4</b>   | 0.004  | 0.005  | 0.01   | 0.006 | 0.005   | 0.005   |

**Supplemental Table 2.** Empirical false positive rate for multivariate normal distributions with correlation 0.25

|                  | MCMDR1 | MCMDR2 | MCMDR3 | MQMDR | QMDR.Y1 | QMDR.Y2 |
|------------------|--------|--------|--------|-------|---------|---------|
| <b>HET:0.01</b>  | 0.006  | 0.003  | 0.003  | 0.002 | 0.003   | 0.003   |
| <b>HET:0.025</b> | 0.003  | 0.001  | 0.006  | 0.003 | 0.007   | 0.004   |
| <b>HET:0.05</b>  | 0.01   | 0.01   | 0.012  | 0.009 | 0.006   | 0.005   |
| <b>HET:0.1</b>   | 0.003  | 0.004  | 0.003  | 0.003 | 0.004   | 0.005   |
| <b>HET:0.2</b>   | 0.006  | 0.003  | 0.006  | 0.008 | 0.006   | 0.006   |
| <b>HET:0.3</b>   | 0.007  | 0.008  | 0.006  | 0.007 | 0.006   | 0.005   |
| <b>HET:0.4</b>   | 0.005  | 0.004  | 0.005  | 0.006 | 0.004   | 0.002   |

**Supplemental Table 3.** Empirical false positive rate for multivariate normal distributions with correlation 0.5

## Multivariate gamma distribution

|                  | MCMDR1 | MCMDR2 | MCMDR3 | MQMDR | QMDR.Y1 | QMDR.Y2 |
|------------------|--------|--------|--------|-------|---------|---------|
| <b>HET:0.01</b>  | 0.007  | 0.003  | 0.008  | 0.003 | 0.005   | 0.001   |
| <b>HET:0.025</b> | 0.004  | 0.005  | 0.003  | 0.005 | 0.008   | 0.003   |
| <b>HET:0.05</b>  | 0.008  | 0.007  | 0.005  | 0.008 | 0.006   | 0.008   |
| <b>HET:0.1</b>   | 0.004  | 0.005  | 0.003  | 0.007 | 0.009   | 0.002   |
| <b>HET:0.2</b>   | 0.006  | 0.006  | 0.003  | 0.004 | 0.008   | 0.003   |
| <b>HET:0.3</b>   | 0.002  | 0.001  | 0.001  | 0.002 | 0.001   | 0.001   |
| <b>HET:0.4</b>   | 0.002  | 0.003  | 0.003  | 0.004 | 0.005   | 0.009   |

**Supplemental Table 4.** Empirical false positive rate for multivariate gamma distributions with zero correlation

|                  | MCMDR1 | MCMDR2 | MCMDR3 | MQMDR | QMDR.Y1 | QMDR.Y2 |
|------------------|--------|--------|--------|-------|---------|---------|
| <b>HET:0.01</b>  | 0.005  | 0.004  | 0.003  | 0.006 | 0.005   | 0.002   |
| <b>HET:0.025</b> | 0.002  | 0.005  | 0.002  | 0.003 | 0.009   | 0.002   |
| <b>HET:0.05</b>  | 0.004  | 0.007  | 0.008  | 0.007 | 0.007   | 0.004   |
| <b>HET:0.1</b>   | 0.006  | 0.002  | 0.002  | 0.008 | 0.007   | 0.006   |
| <b>HET:0.2</b>   | 0.004  | 0.006  | 0.003  | 0.003 | 0.01    | 0.002   |
| <b>HET:0.3</b>   | 0.001  | 0.001  | 0.005  | 0.002 | 0.002   | 0       |
| <b>HET:0.4</b>   | 0.002  | 0.003  | 0.008  | 0.004 | 0.006   | 0.006   |

**Supplemental Table 5.** Empirical false positive rate for multivariate gamma distributions with correlation 0.25

|                  | MCMDR1 | MCMDR2 | MCMDR3 | MQMDR | QMDR.Y1 | QMDR.Y2 |
|------------------|--------|--------|--------|-------|---------|---------|
| <b>HET:0.01</b>  | 0.004  | 0.003  | 0.003  | 0.005 | 0.001   | 0.007   |
| <b>HET:0.025</b> | 0.005  | 0.008  | 0.009  | 0.01  | 0.006   | 0.005   |
| <b>HET:0.05</b>  | 0.004  | 0.004  | 0.007  | 0.004 | 0.007   | 0.004   |
| <b>HET:0.1</b>   | 0.009  | 0.006  | 0.004  | 0.006 | 0.006   | 0.005   |
| <b>HET:0.2</b>   | 0.005  | 0.005  | 0.003  | 0.004 | 0.01    | 0.004   |
| <b>HET:0.3</b>   | 0.001  | 0.002  | 0.005  | 0.001 | 0.005   | 0.002   |
| <b>HET:0.4</b>   | 0.001  | 0.004  | 0.003  | 0.004 | 0.005   | 0.002   |

**Supplemental Table 6.** Empirical false positive rate for multivariate gamma distributions with correlation 0.5
